# Supplementary material
Source: PubMed Central journal article supplement (PMC3318802)
Supplement: supp_78.8.3014_AEM7949-11_TableS1.pdf [file supp_78.8.3014_AEM7949-11_TableS1.pdf]

Supplemental TABLE S1. Properties of earthworm substrates<sup>a</sup>

|                          | pH (H <sub>2</sub> O) | Moisture (%) | NH <sub>4</sub> <sup>+</sup> concn (mg [kg fw] <sup>-1</sup> ) | NO <sub>3</sub> <sup>-</sup> concn (mg [kg fw] <sup>-1</sup> ) | P (mg [kg fw] <sup>-1</sup> ) | K (mg [kg fw] <sup>-1</sup> ) | Total organic material concn (g [kg fw] <sup>-1</sup> ) | Total nitrogen concn (g [kg fw] <sup>-1</sup> ) |
|--------------------------|-----------------------|--------------|----------------------------------------------------------------|----------------------------------------------------------------|-------------------------------|-------------------------------|---------------------------------------------------------|-------------------------------------------------|
| Substrate 1 <sup>b</sup> | 8.0                   | 76           | 95                                                             | 60                                                             | 2,276                         | 164                           | 594                                                     | 14.84                                           |
| Substrate 2 <sup>c</sup> | 7.5                   | 59           | 90                                                             | 56                                                             | 1,751                         | 34                            | 414                                                     | 14.71                                           |
| Substrate 3 <sup>d</sup> | 7.6                   | 56           | 64                                                             | 28                                                             | 270                           | 91                            | 283                                                     | 10.92                                           |
| Substrate 4 <sup>e</sup> | 6.5                   | 22           | 28                                                             | 13                                                             | 9                             | 8                             | 40                                                      | 3.36                                            |

<sup>a</sup> Substrates were obtained and analyzed in September 2011. Abbreviation: fw, fresh weight. See text for further information.

<sup>b</sup> Commercially processed cow manure.

<sup>c</sup> Residues from commercially processed sugarcane.

<sup>d</sup> Residues from commercially processed sugarcane.

<sup>e</sup> Grassland soil.
